# Supplementary material for: Safety of Intra-articular Hyaluronic Acid Injections in Osteoarthritis: Outcomes of a Systematic Review and Meta-Analysis
Source: PubMed Central journal article supplement — Drugs Aging. 2019 May 9;36(Suppl 1):101–27. doi: 10.1007/s40266-019-00657-w (PMC6509101; doi:10.1007/s40266-019-00657-w), 2019-05-09

**Drugs and Aging, 2019**

**Supplement: Safety of Anti-Osteoarthritis Medications**

**Safety of intra-articular hyaluronic acid injections in osteoarthritis: outcomes of a systematic review and meta-analysis**

Germain Honvo, Jean-Yves Reginster, Francois Rannou, Xavier Rygaert, Anton Geerinck, Véronique Rabenda, Tim McAlindon, Alexia Charles, Nicholas Fuggle, Cyrus Cooper, Elizabeth Curtis, Nigel Arden, Bernard Avouac, Olivier Bruyère

**ELECTRONIC SUPPLEMENTARY MATERIAL 2**

**Figure 9:** Forest plot displaying the results of the meta-analyses comparing gastrointestinal disorders with intra-articular hyaluronic acid versus placebo in patients with OA: Overall analysis and analyses on studies with and without concomitant anti-OA medication allowed

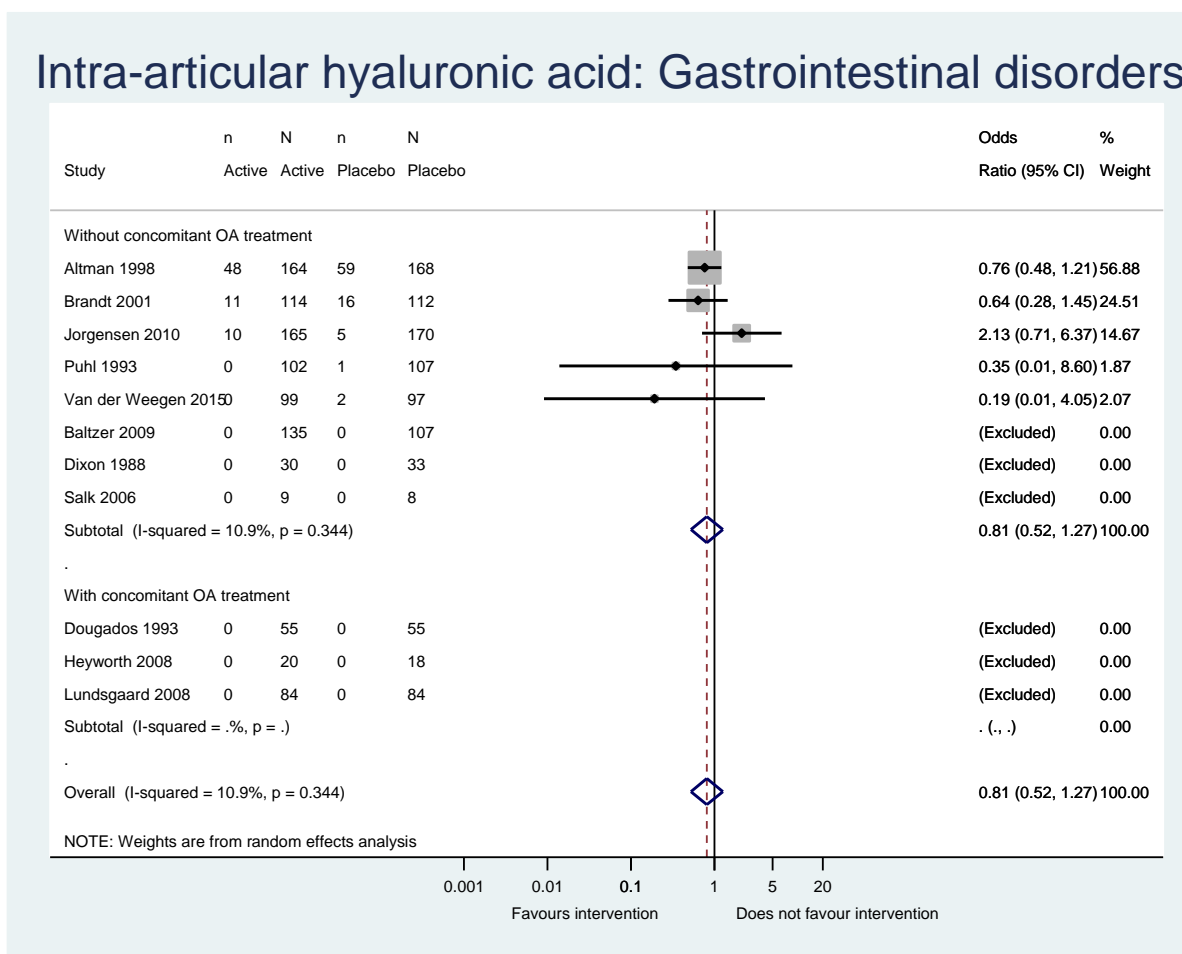

**Figure 10:** Forest plot displaying the results of the meta-analyses comparing cardiac disorders with intra-articular hyaluronic acid versus placebo in patients with OA: Overall analysis and analyses on studies with and without concomitant anti-OA medication allowed

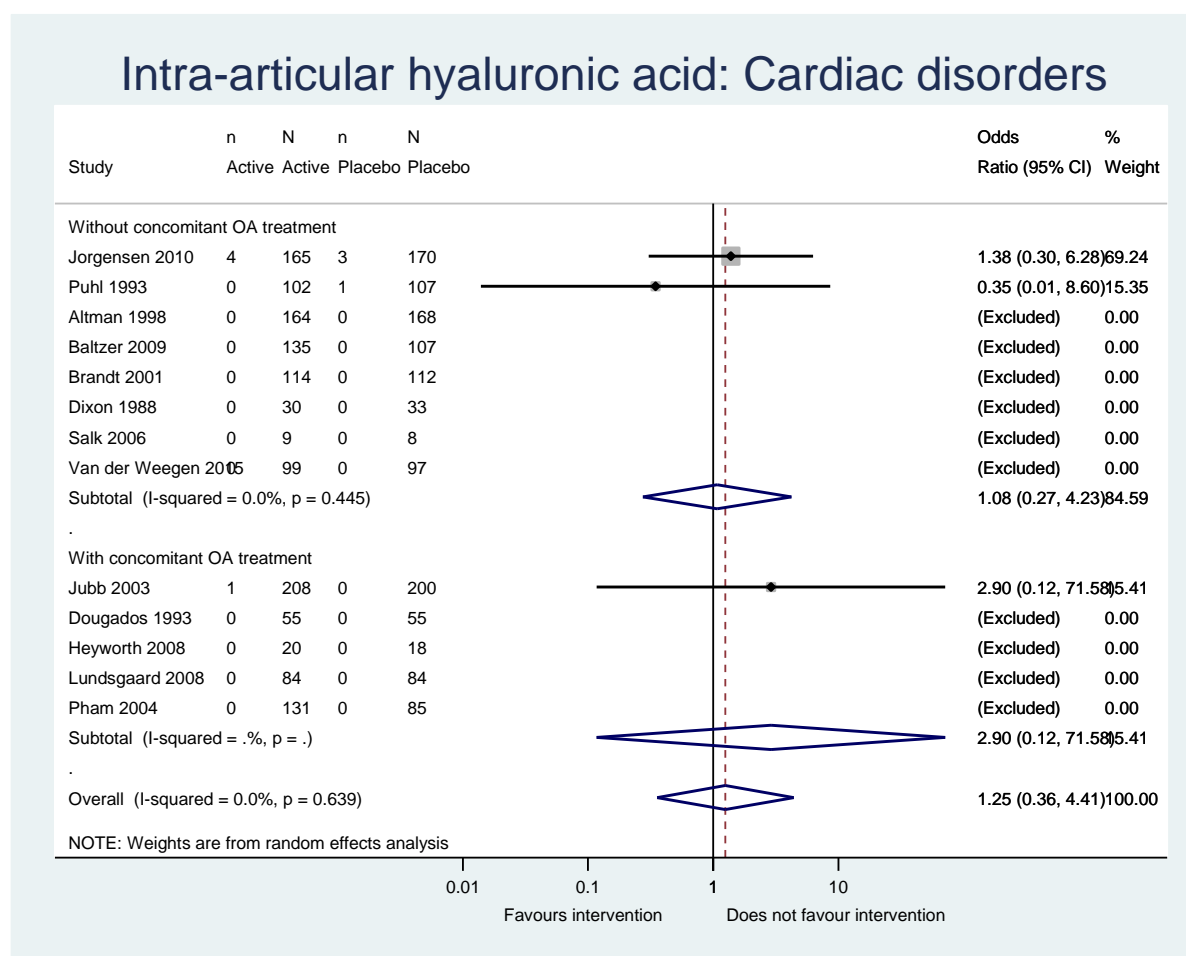

**Figure 11:** Forest plot displaying the results of the meta-analyses comparing vascular disorders with intra-articular hyaluronic acid versus placebo in patients with OA: Overall analysis and analyses on studies with and without concomitant anti-OA medication allowed

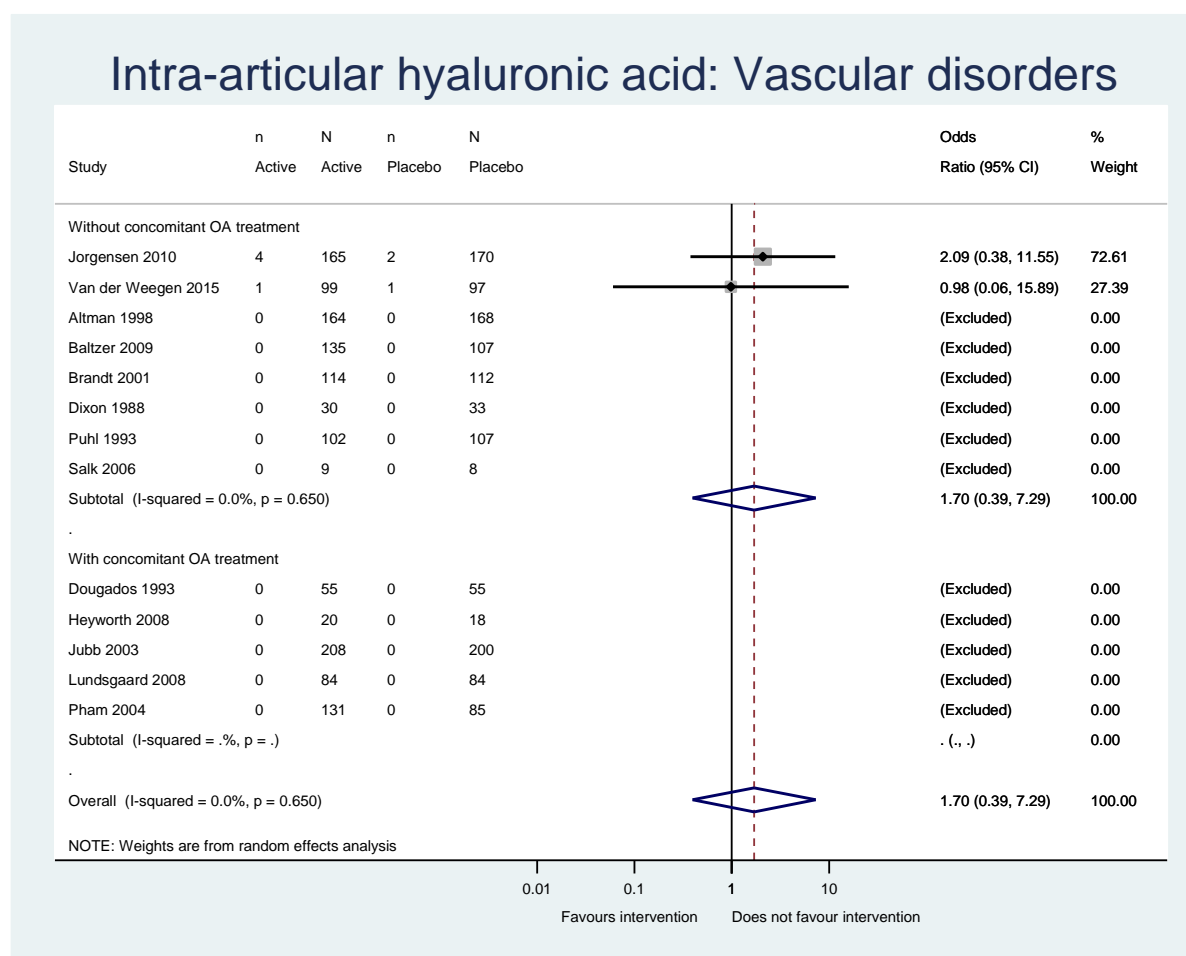

**Figure 12:** Forest plot displaying the results of the meta-analyses comparing respiratory, thoracic and mediastinal disorders with intra-articular hyaluronic acid versus placebo in patients with OA: Overall analysis and analyses on studies with and without concomitant anti-OA medication allowed

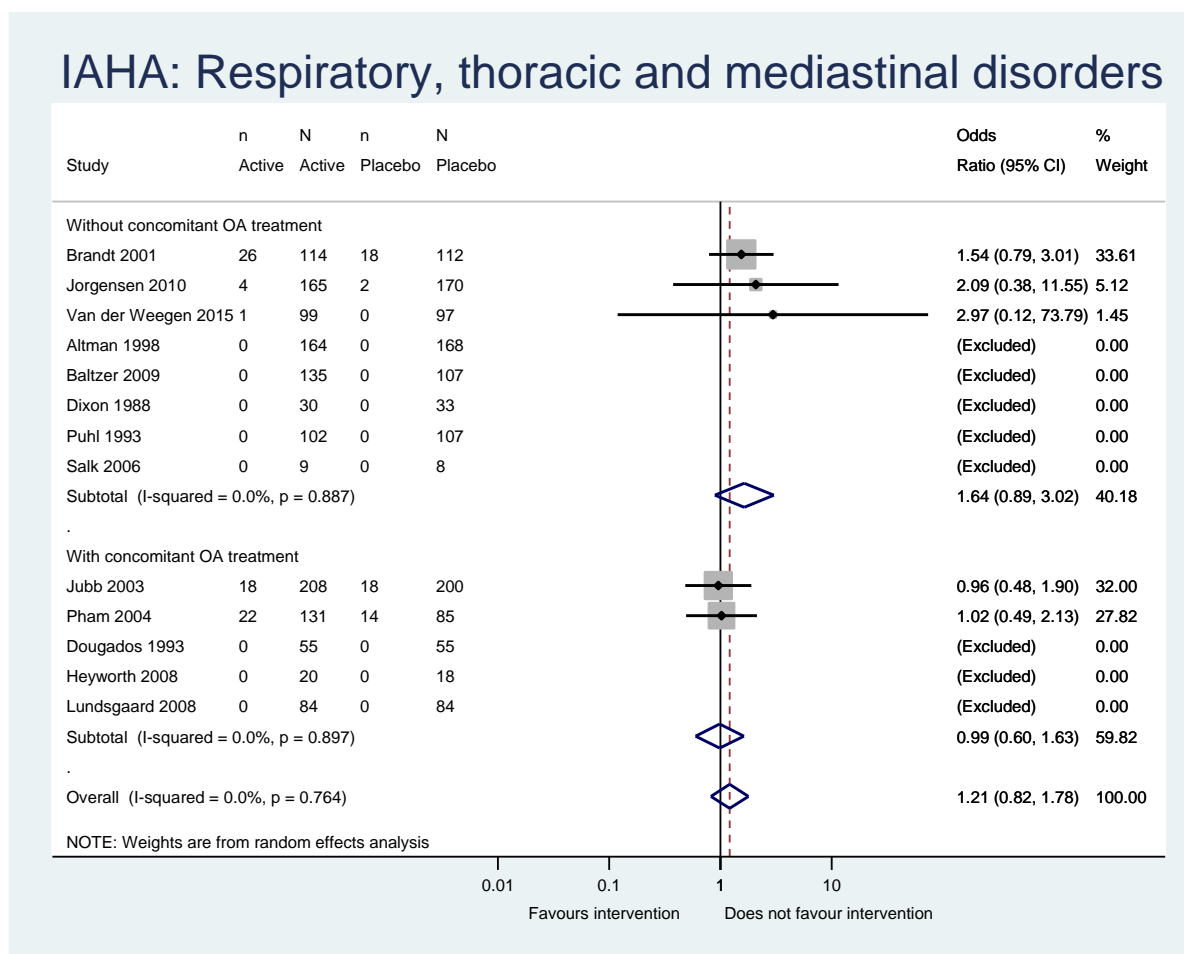

**Figure 13:** Forest plot displaying the results of the meta-analyses comparing nervous system disorders with intra-articular hyaluronic acid versus placebo in patients with OA: Overall analysis and analyses on studies with and without concomitant anti-OA medication allowed

## Intra-articular hyaluronic acid: Nervous system disorders

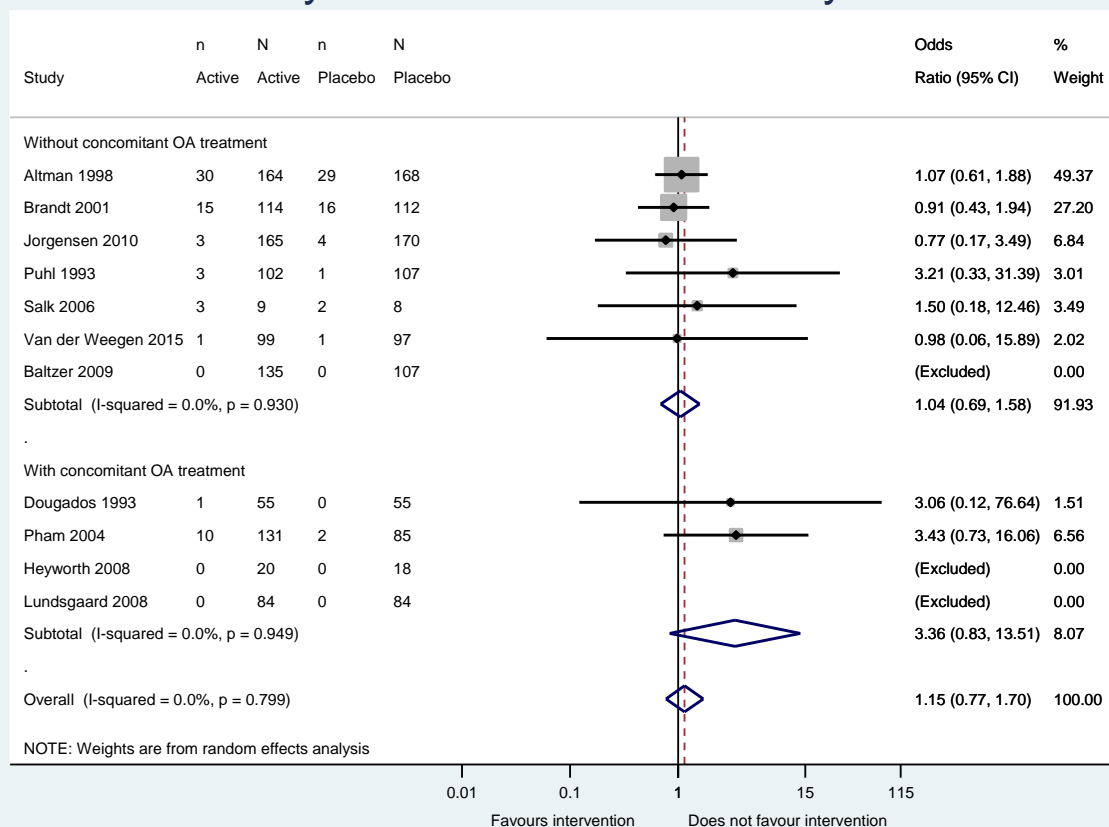

**Figure 14:** Forest plot displaying the results of the meta-analyses comparing skin and subcutaneous tissue disorders with intra-articular hyaluronic acid versus placebo in patients with OA: Overall analysis and analyses on studies with and without concomitant anti-OA medication allowed

### Intra-articular hyaluronic acid: Skin and subcutaneous tissue disorders

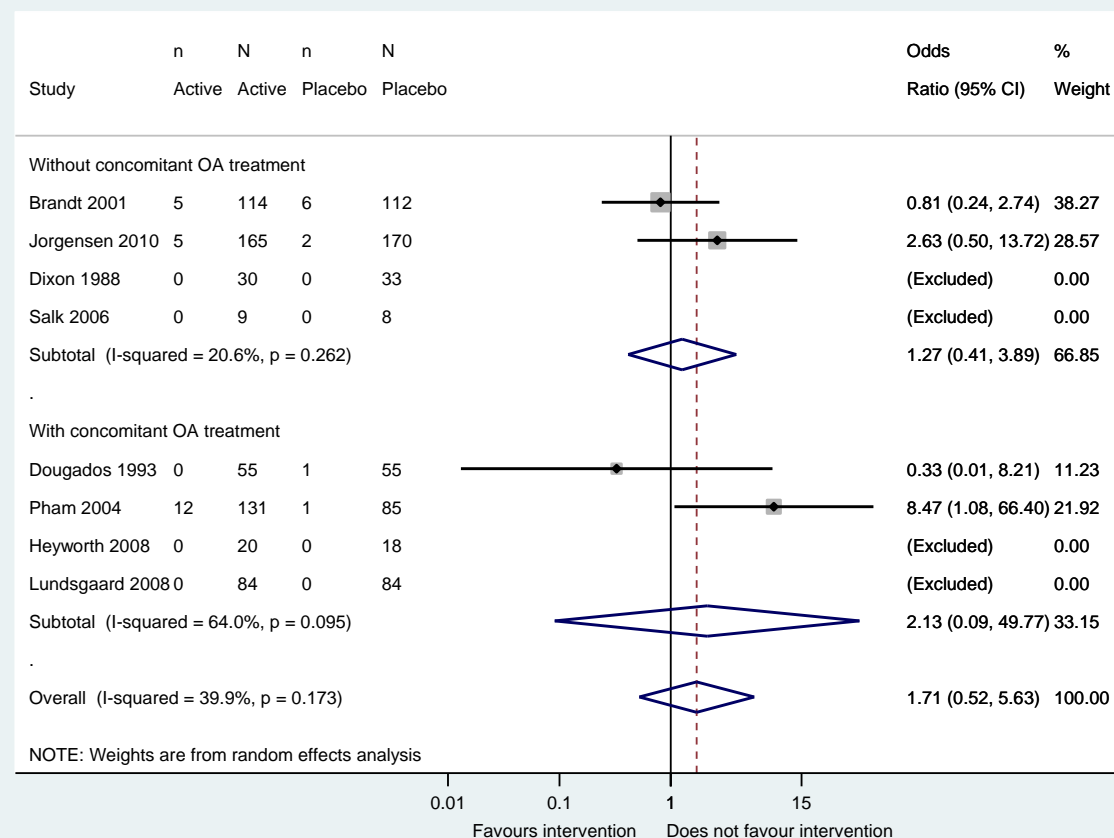

**Figure 15:** Forest plot displaying the results of the meta-analyses comparing musculoskeletal and connective tissue disorders with intra-articular hyaluronic acid versus placebo in patients with OA: Overall analysis and analyses on studies with and without concomitant anti-OA medication allowed

### Intra-articular hyaluronic acid: Musculoskeletal and connective tissue disorders

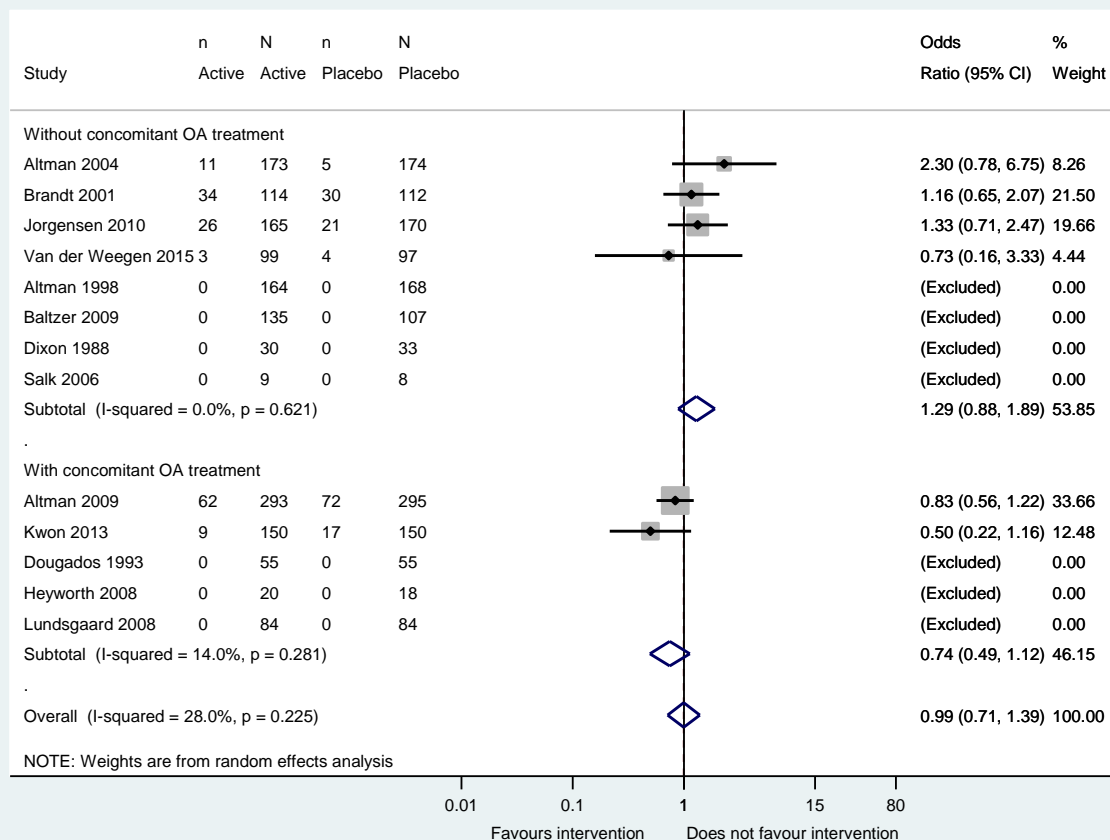

**Figure 16:** Forest plot displaying the results of the meta-analyses comparing renal and urinary disorders with intra-articular hyaluronic acid versus placebo in patients with OA: Overall analysis and analyses on studies with and without concomitant anti-OA medication allowed

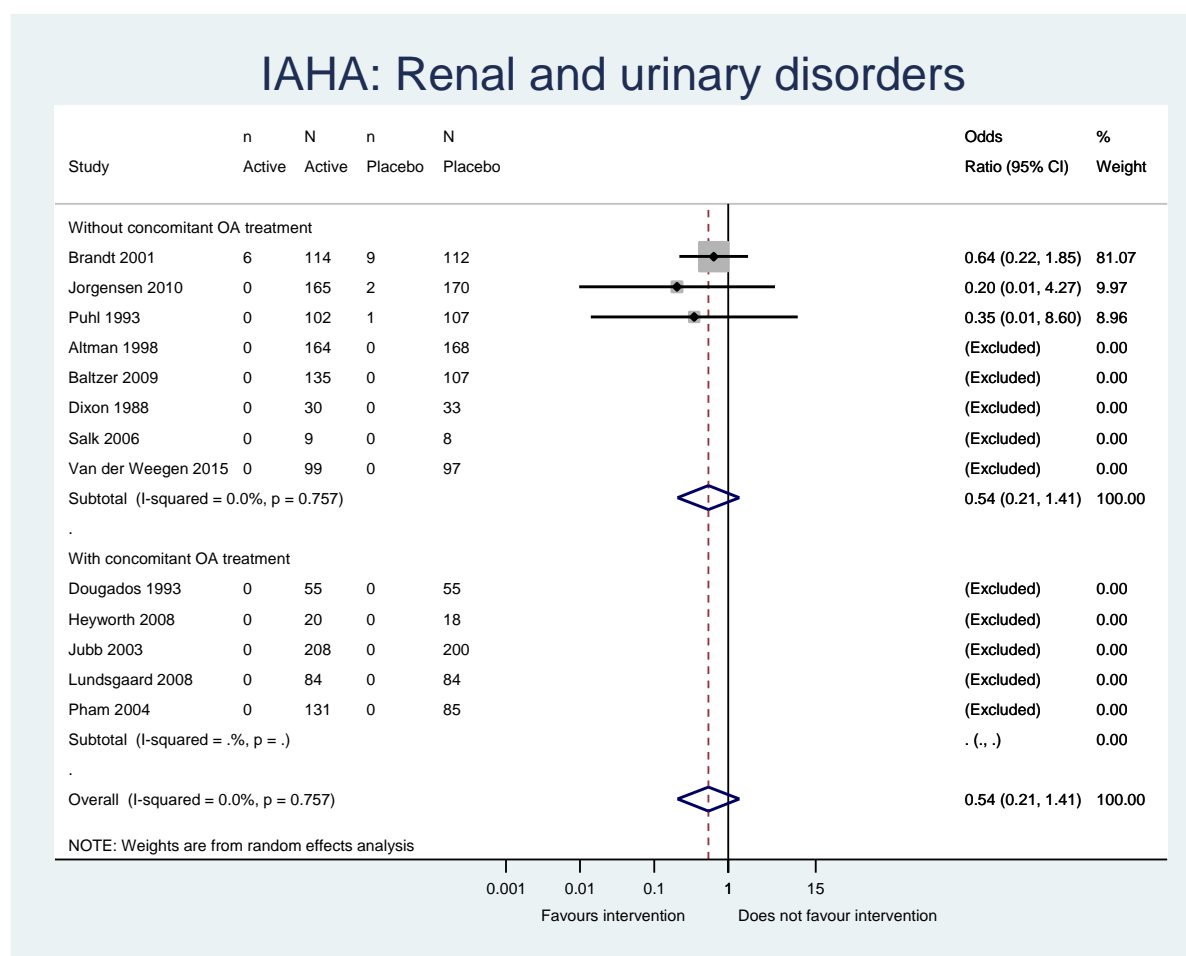

**Figure 17:** Forest plot displaying the results of the meta-analyses comparing hypersensitivity reaction with intra-articular hyaluronic acid versus placebo in patients with OA: Overall analysis and analyses on studies with and without concomitant anti-OA medication allowed

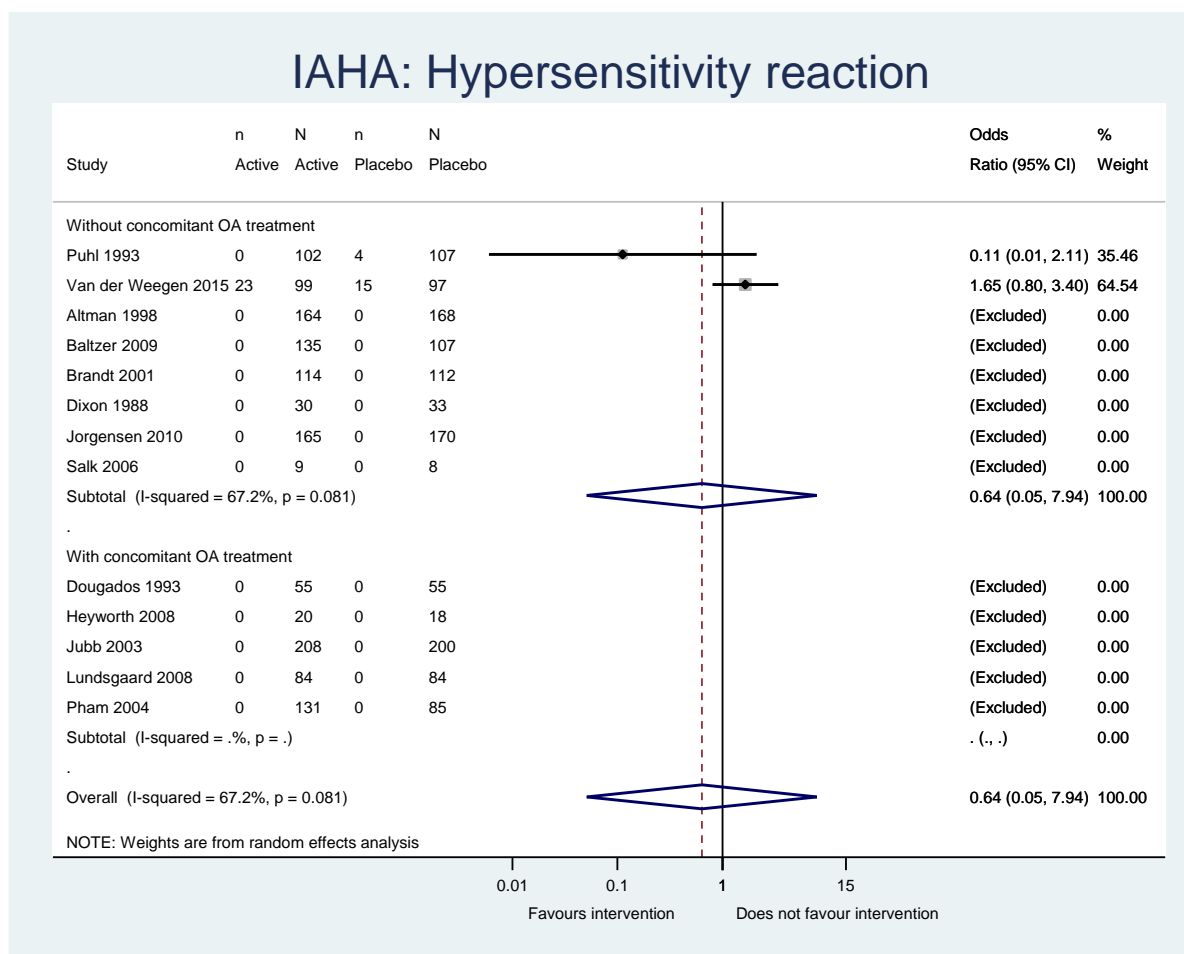

**Figure 18:** Forest plot displaying the results of the meta-analyses comparing severe adverse events with intra-articular hyaluronic acid versus placebo in patients with OA: Overall analysis and analyses on studies with and without concomitant anti-OA medication allowed

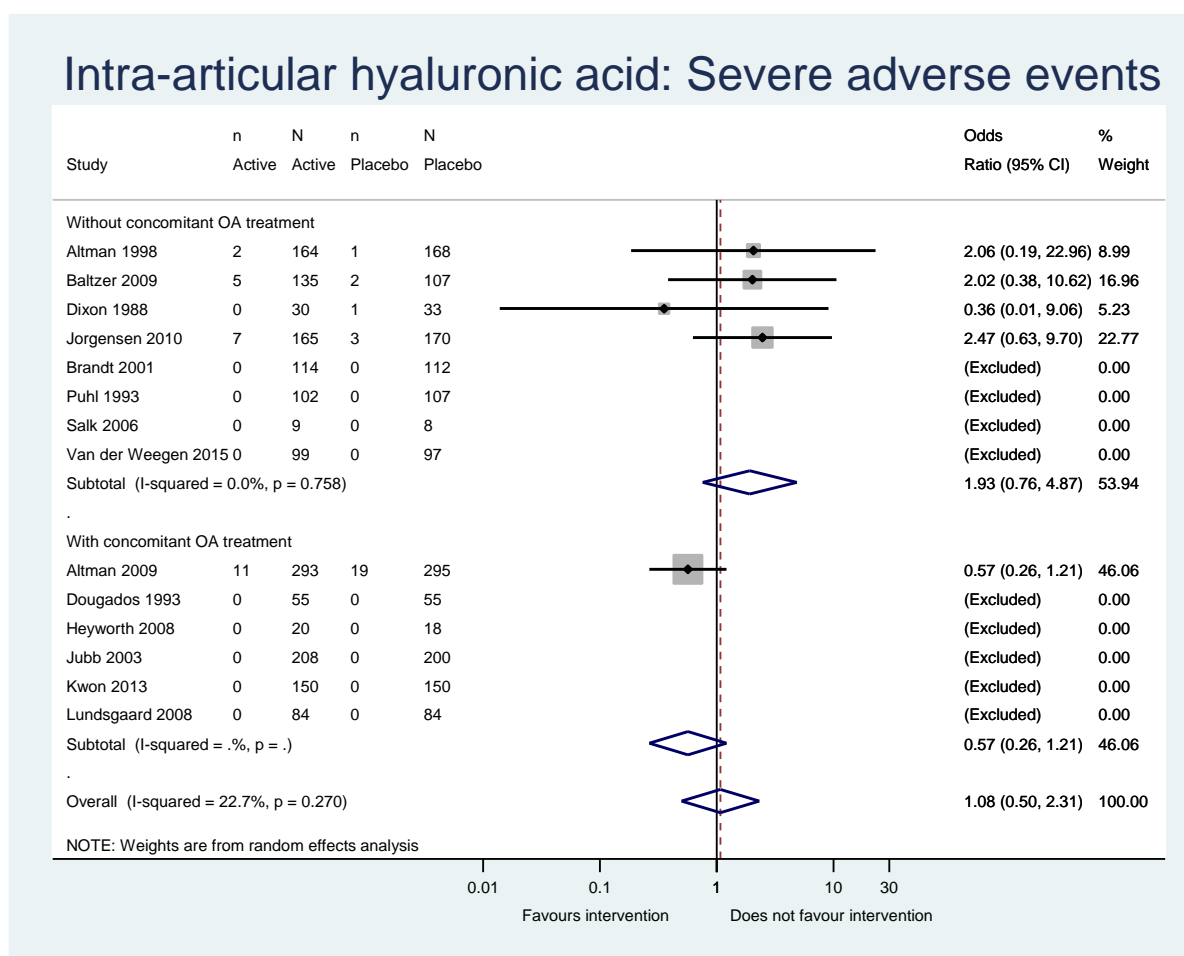

Supplement: 40266_2019_657_MOESM2_ESM.pdf [file 40266_2019_657_MOESM2_ESM.pdf]
