# Supplementary material for: Safety of Intra-articular Hyaluronic Acid Injections in Osteoarthritis: Outcomes of a Systematic Review and Meta-Analysis
Source: PubMed Central journal article supplement — Drugs Aging. 2019 May 9;36(Suppl 1):101–27. doi: 10.1007/s40266-019-00657-w (PMC6509101; doi:10.1007/s40266-019-00657-w), 2019-05-09
Supplement: 40266_2019_657_MOESM1_ESM.pdf [file 40266_2019_657_MOESM1_ESM.pdf]

**Drugs and Aging, 2019**

**Supplement: Safety of Anti-Osteoarthritis Medications**

**Safety of intra-articular hyaluronic acid injections in osteoarthritis: outcomes of a systematic review and meta-analysis**

Germain Honvo, Jean-Yves Reginster, Francois Rannou, Xavier Rygaert, Anton Geerinck, Véronique Rabenda, Tim McAlindon, Alexia Charles, Nicholas Fuggle, Cyrus Cooper, Elizabeth Curtis, Nigel Arden, Bernard Avouac, Olivier Bruyère

**ELECTRONIC SUPPLEMENTARY MATERIAL 1**

## Search strategies

**Databases:** Ovid MEDLINE(R) Epub Ahead of Print, In-Process & Other Non-Indexed Citations, Ovid MEDLINE(R) Daily and Ovid MEDLINE(R)

& Cochrane Central Register of Controlled Trials, via Ovid (Ovid CENTRAL)

### Search Strategy:

1. exp Osteoarthritis/
2. (degenerative adj (arthritis OR joint\*1 OR arthritides)).ti,ab,kw.
3. (osteoarthr\* OR arthros\* OR coxarthros\* OR gonarthros\* OR joint failure\*1 OR osteoarthritis OR OA).ti,ab,kw.
4. 1 OR 2 OR 3
5. Hyaluronic Acid/
6. (Hyaluronat\* OR Hyaluronic OR Hyaluronan\*1 OR Hylan\*1).ti,ab,kw.
7. 5 OR 6
8. exp Injections, Intra-Articular/
9. (Injection\*1 OR Viscosupplement\* OR Intra-articular\* OR Intraarticular\* OR Solution\*1 OR Instillation\*1 OR Supplement\* OR Infiltration\*1).ti,ab,kw.
10. 8 OR 9
11. Randomized controlled trial.pt.
12. Controlled clinical trial.pt.
13. Randomized Controlled Trials as Topic/
14. Controlled Clinical Trials as Topic/
15. ("Randomized controlled trial\*" OR "Randomized clinical trial\*" OR "Controlled clinical trial\*" OR Placebo-controlled OR Sham-controlled OR Saline-controlled OR Vehicle-controlled OR "Randomized double-blind" OR Random\* OR Placebo OR RCT).ti,ab,kw.
16. 11 OR 12 OR 13 OR 14 OR 15
17. 4 AND 7 AND 10 AND 16

**Database:** SCOPUS

**Search Strategy:**

(TITLE-ABS-KEY (osteoarthr\* OR arthrosis OR coxarthros\* OR gonarthros\* OR "joint failure\*" OR osteo-arthritis OR OA) OR TITLE-ABS-KEY (degenerative W/O (arthritis OR joint\* OR arthritides))  
)

**AND**

(TITLE-ABS-KEY (Hyaluronat\* OR Hyaluronic OR Hyaluronan\* OR Hylan\*)  
)

**AND**

(TITLE-ABS-KEY (Injection OR Viscosupplement\* OR Intra-articular\* OR Intraarticular\* OR Solution OR Instillation OR Supplement\* OR Infiltration)  
)

**AND**

(TITLE-ABS-KEY ("Randomized controlled trial\*" OR "Randomized clinical trial\*" OR "Controlled clinical trial\*" OR Placebo-controlled OR Sham-controlled OR Saline-controlled OR Vehicle-controlled OR "Randomized double-blind" OR Random\* OR Placebo OR RCT)  
)

**AND**

(LIMIT-TO (DOCTYPE,"ar")  
OR LIMIT-TO (DOCTYPE,"ip"))
