# Supplementary material for: Safety of Intra-articular Hyaluronic Acid Injections in Osteoarthritis: Outcomes of a Systematic Review and Meta-Analysis
Source: PubMed Central journal article supplement — Drugs Aging. 2019 May 9;36(Suppl 1):101–27. doi: 10.1007/s40266-019-00657-w (PMC6509101; doi:10.1007/s40266-019-00657-w), 2019-05-09
Supplement: 40266_2019_657_MOESM3_ESM.pdf [file 40266_2019_657_MOESM3_ESM.pdf]

**Drugs and Aging, 2019**

**Supplement: Safety of Anti-Osteoarthritis Medications**

**Safety of intra-articular hyaluronic acid injections in osteoarthritis: outcomes of a systematic review and meta-analysis**

Germain Honvo, Jean-Yves Reginster, Francois Rannou, Xavier Rygaert, Anton Geerinck, Véronique Rabenda, Tim McAlindon, Alexia Charles, Nicholas Fuggle, Cyrus Cooper, Elizabeth Curtis, Nigel Arden, Bernard Avouac, Olivier Bruyère

**ELECTRONIC SUPPLEMENTARY MATERIAL 3**

**Figure 19:** Funnel plot using data for the meta-analysis comparing gastrointestinal disorders with intra-articular hyaluronic acid versus placebo in patients with OA

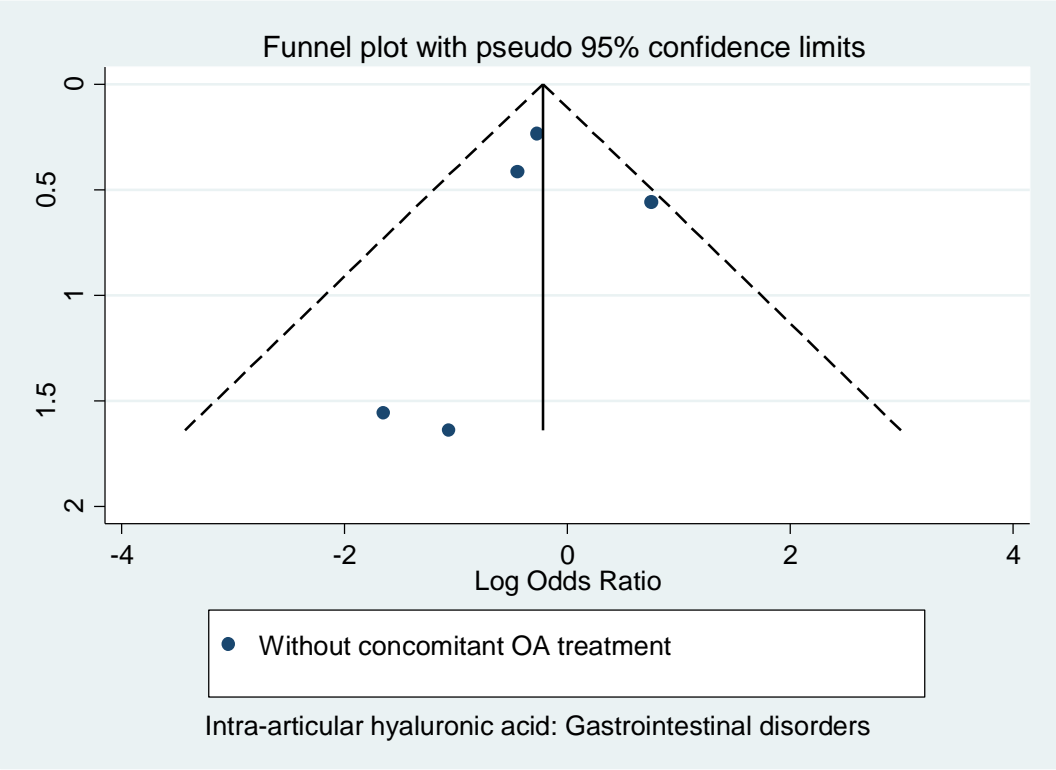

**Figure 20:** Funnel plot using data for the meta-analysis comparing respiratory, thoracic and mediastinal disorders with intra-articular hyaluronic acid versus placebo in patients with OA

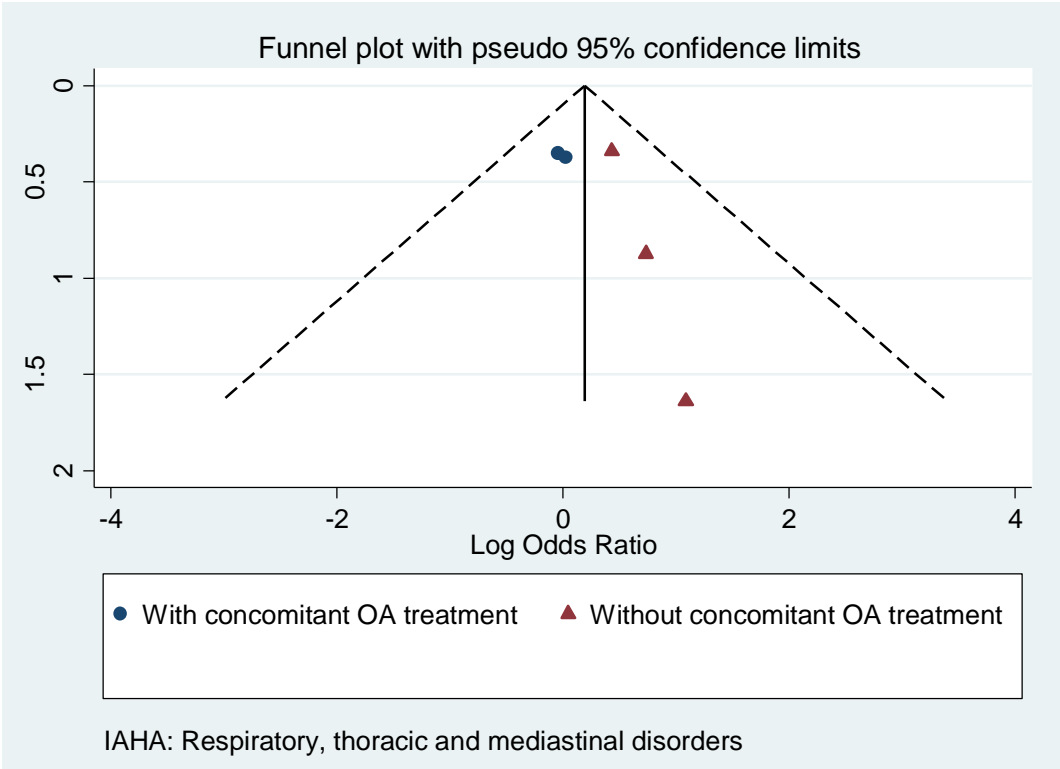

**Figure 21:** Funnel plot using data for the meta-analysis comparing nervous system disorders with intra-articular hyaluronic acid versus placebo in patients with OA

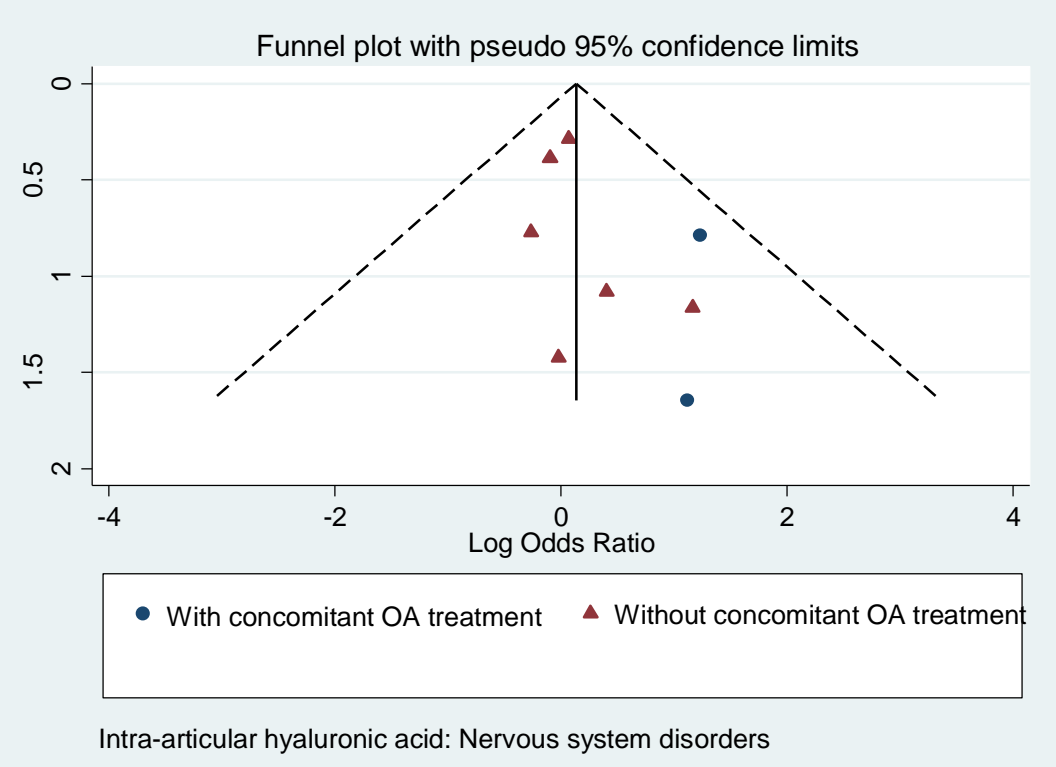

**Figure 22:** Funnel plot using data for the meta-analysis comparing musculoskeletal and connective tissue disorders with intra-articular hyaluronic acid versus placebo in patients with OA

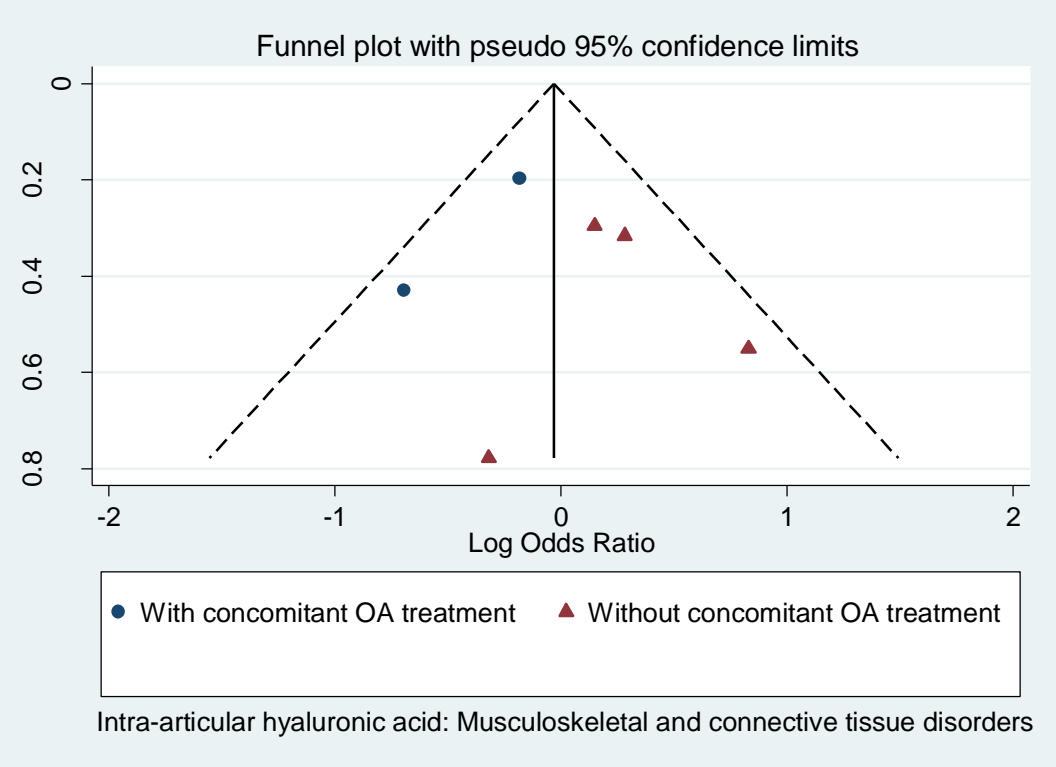

**Figure 23:** Funnel plot using data for the meta-analysis comparing severe adverse events with intra-articular hyaluronic acid versus placebo in patients with OA

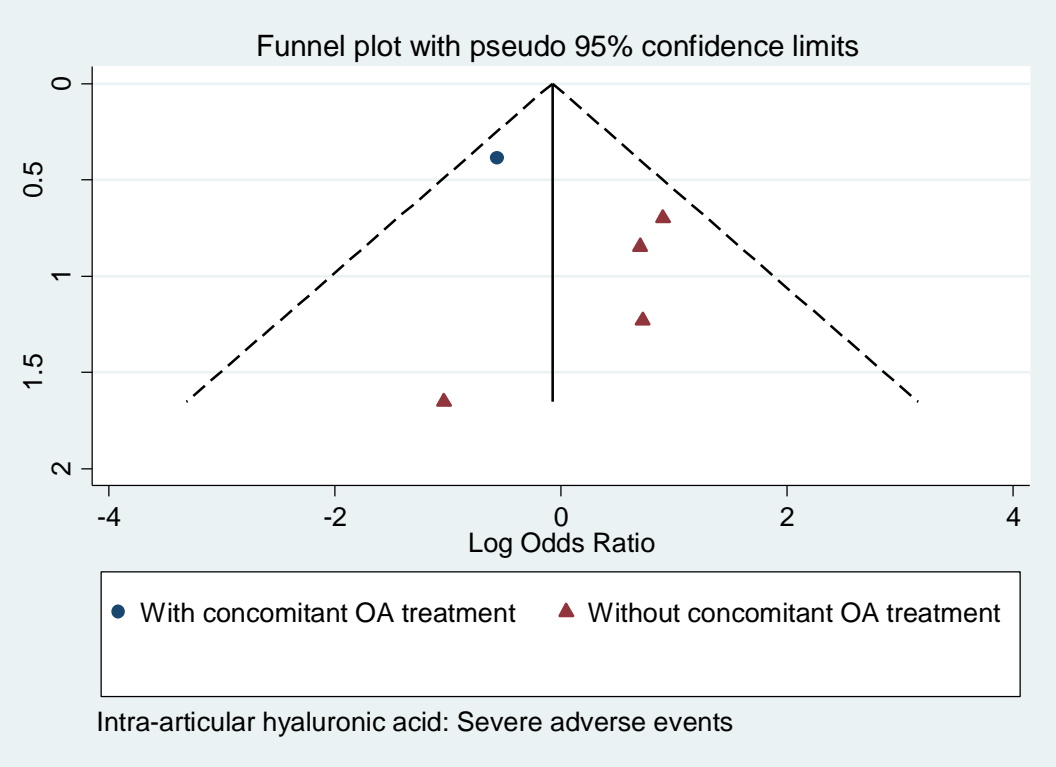

**Figure 24:** Funnel plot using data for the meta-analysis comparing serious adverse events with intra-articular hyaluronic acid versus placebo in patients with OA

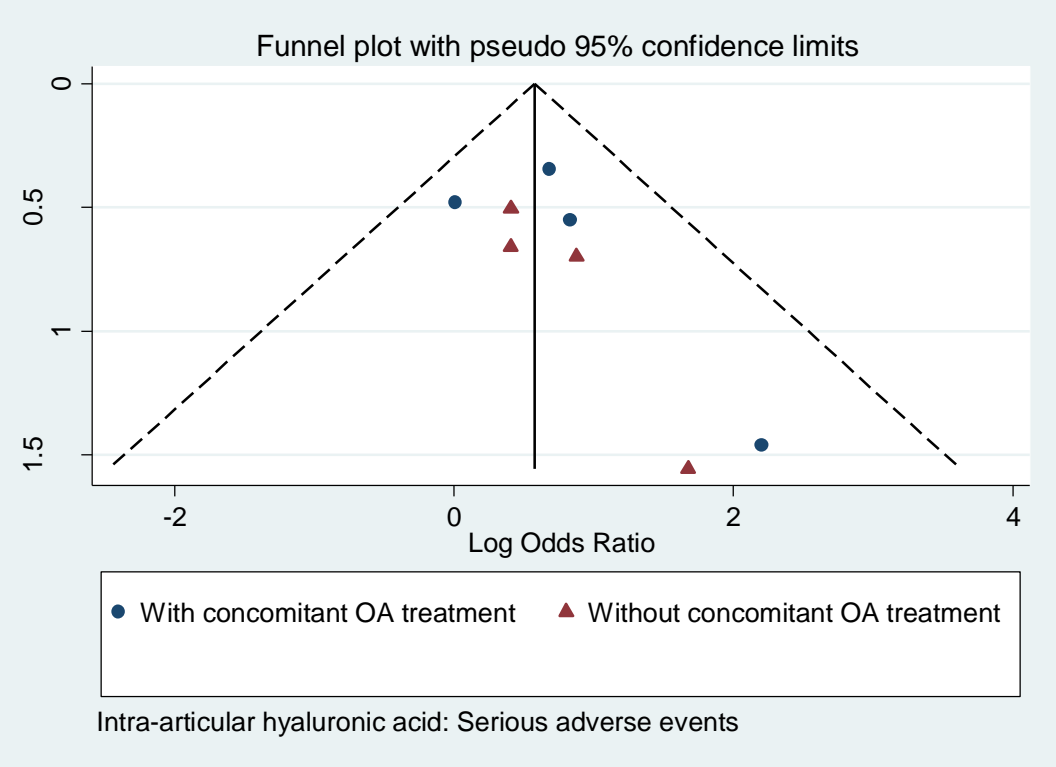

**Figure 25:** Funnel plot using data for the meta-analysis comparing dropouts due to adverse events with intra-articular hyaluronic acid versus placebo in patients with OA

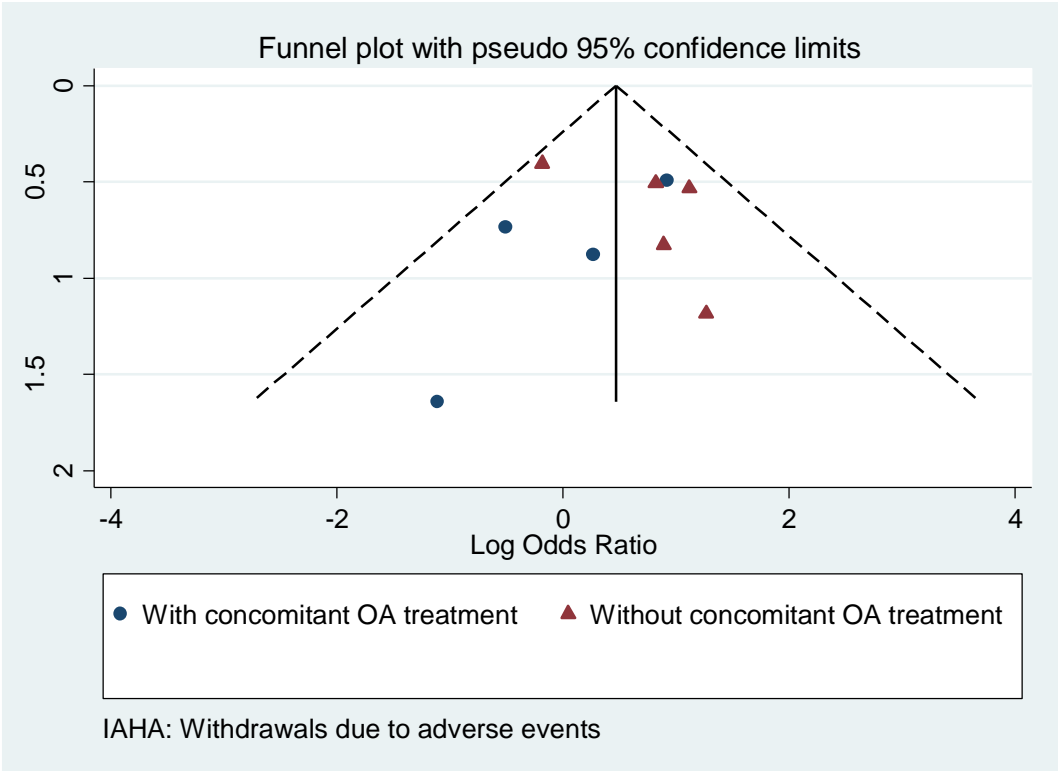

Note: A very few number of studies (<5) were available for the meta-analyses for cardiac disorders, vascular disorders, skin and subcutaneous tissue disorders, renal and urinary disorders, infections and infestations, and hypersensitivity reaction; therefore, the funnel plots for these outcomes are not displayed.
